# Supplementary material for: Redox and pH dual sensitive bone targeting nanoparticles to treat breast cancer bone metastases and inhibit bone resorption
Source: Royal Society of Chemistry journal article supplement (doi:10.1039/c7nr00962c), 2017-01-01
Supplement: c7nr00962c9.pdf [file c7nr00962c9.pdf]

## Supporting Information

### Redox and pH dual sensitive bone targeting nanoparticle to treat breast cancer bone metastases and inhibit bone resorption

Yi-puZhao<sup>1‡</sup>, Wei-liangYe<sup>1‡</sup>, Dao-zhou Liu<sup>1</sup>, Han Cui<sup>1</sup>, Ying Cheng<sup>1</sup>, Miao Liu<sup>1</sup>,  
Bang-le Zhang<sup>1</sup>, Qi-bing Mei<sup>2</sup>, Si-yuan Zhou<sup>1,2\*</sup>

#### Legends:

**SFig.1** The synthetic route of ALN-HA-PASP conjugate.

**SFig.2** <sup>1</sup>H NMR spectrum of HA-PASP conjugate (panel A) and ALN-HA-PASP conjugate (panel B).

**SFig.3** The X-ray photoelectric spectroscopy (XPS) spectra of DOX@HA-PASP, DOX@ALN-HA-PASP and DOX@ALN-(HA-PASP)<sub>CL</sub>.

**SFig.4** Stability of DOX@ALN-HA-PASP and DOX@ALN-(HA-PASP)<sub>CL</sub> in pH7.4 PBS medium (panel A) and in pH5.0 PBS medium (panel B) at room temperature.

**SFig.5** The hemolytic rate of HA-PASP blank nanoparticle, ALN-HA-PASP blank nanoparticle and ALN-(HA-PASP)<sub>CL</sub> blank nanoparticle on red blood cell. Data are mean±SD, n=5.

**SFig.6** ALN release from ALN-HA-PASP and ALN-(HA-PASP)<sub>CL</sub> in pH5.0 PBS medium. Data are mean±SD, n=5.

**SFig.7** Cellular uptake of DOX@ALN-(HA-PASP)<sub>CL</sub>, DOX@ALN-HA-PASP, DOX@HA-PASP and free DOX on MDA-MB-231 cells in pH7.4 detected by flow cytometry. Data are mean±SD, n=5. \*P<0.05 vs DOX@HA-PASP.

**SFig.8** The cytotoxicity of HA-PASP blank nanoparticle, ALN-HA-PASP blank nanoparticle and ALN-(HA-PASP)<sub>CL</sub> blank nanoparticle on MDA-MB-231 cells in 24 h. Data are mean±SD, n=5.
