# Supplementary figures and images for: Redox and pH dual sensitive bone targeting nanoparticles to treat breast cancer bone metastases and inhibit bone resorption
Source: Royal Society of Chemistry journal article supplement (doi:10.1039/c7nr00962c), 2017-01-01

A

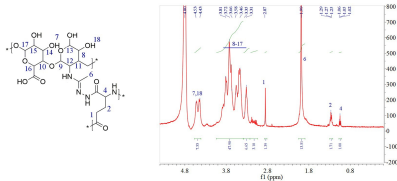

B

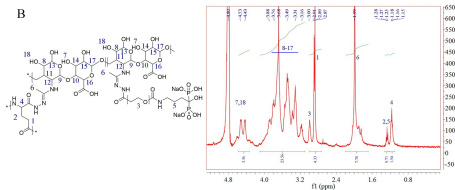

Supplement: c7nr00962c2.pdf [file c7nr00962c2.pdf]

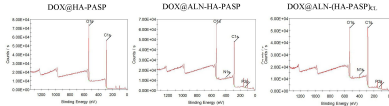

Supplement: c7nr00962c3.pdf [file c7nr00962c3.pdf]

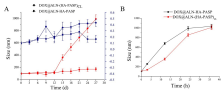

Supplement: c7nr00962c4.pdf [file c7nr00962c4.pdf]

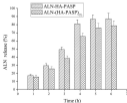

Supplement: c7nr00962c6.pdf [file c7nr00962c6.pdf]

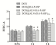

Supplement: c7nr00962c7.pdf [file c7nr00962c7.pdf]

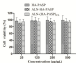

Supplement: c7nr00962c8.pdf [file c7nr00962c8.pdf]
